# Supplementary material for: Engineering Pt–CeO2interfaces for reverse water-gas shift (RWGS) reaction
Source: Royal Society of Chemistry journal article supplement (doi:10.1039/d4lf00064a), 2024-01-01
Supplement: d4lf00064a1.pdf [file d4lf00064a1.pdf]

## Supplementary Information

# Engineering Pt-CeO<sub>2</sub> interfaces for Reverse Water-Gas Shift (RWGS) reaction

Kauê G. G. dos Santos,<sup>a</sup> Alisson S. Thill,<sup>a</sup> Livia P. Matte,<sup>a</sup> Gustavo Z. Giroto,<sup>a</sup> Mateus V. Costa,<sup>a</sup> Denise R. Bohn,<sup>b</sup> Fernanda Poletto,<sup>b</sup> Fabiano Bernardi<sup>a,\*</sup>

<sup>a</sup> Programa de Pós-Graduação em Física, Instituto de Física, Universidade Federal do Rio Grande do Sul, Brazil

<sup>b</sup> Programa de Pós-Graduação em Química, Instituto de Química, Universidade Federal do Rio Grande do Sul, Brazil

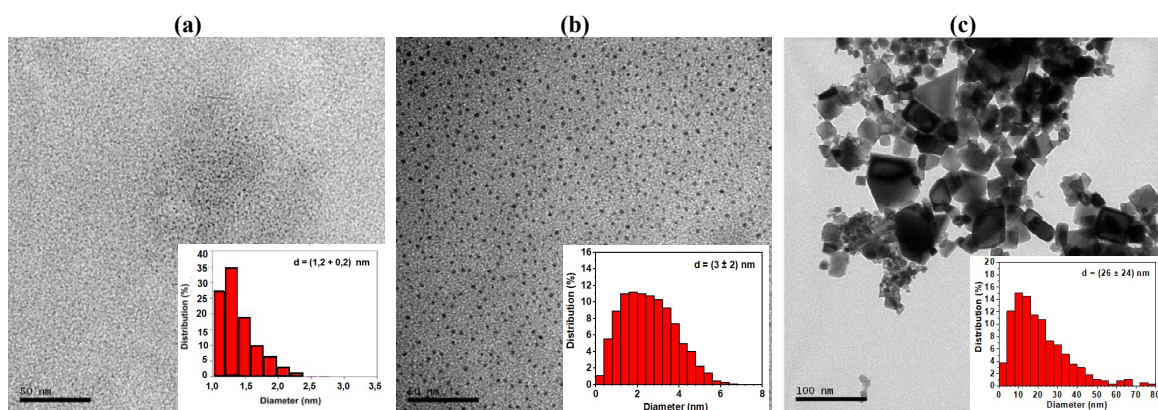

Figure 1 – Typical TEM images of (a) CeO<sub>2</sub> Hyd, (b) CeO<sub>2</sub> High S, and (c) CeO<sub>2</sub> Std nanoparticles.

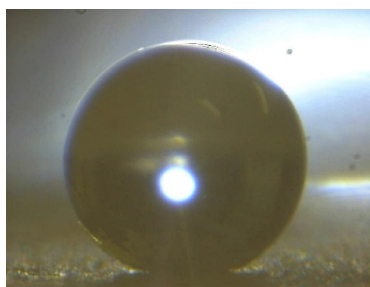

Figure 2 – Typical image of the water drop during the contact angle measurement.

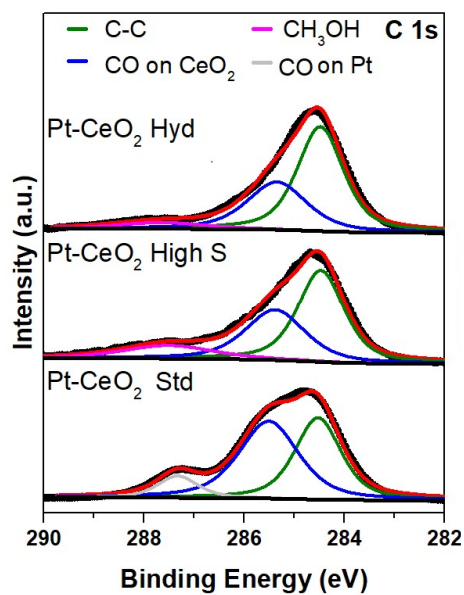

Figure 3 – C 1s XPS spectra of the as prepared Pt-CeO<sub>2</sub> nanoparticles.

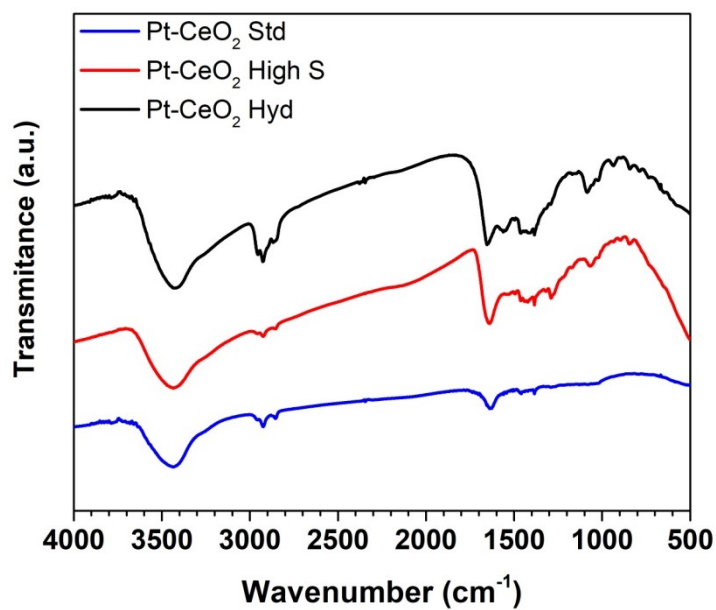

Figure 4 – FTIR spectra of the Pt-CeO<sub>2</sub> nanoparticles.

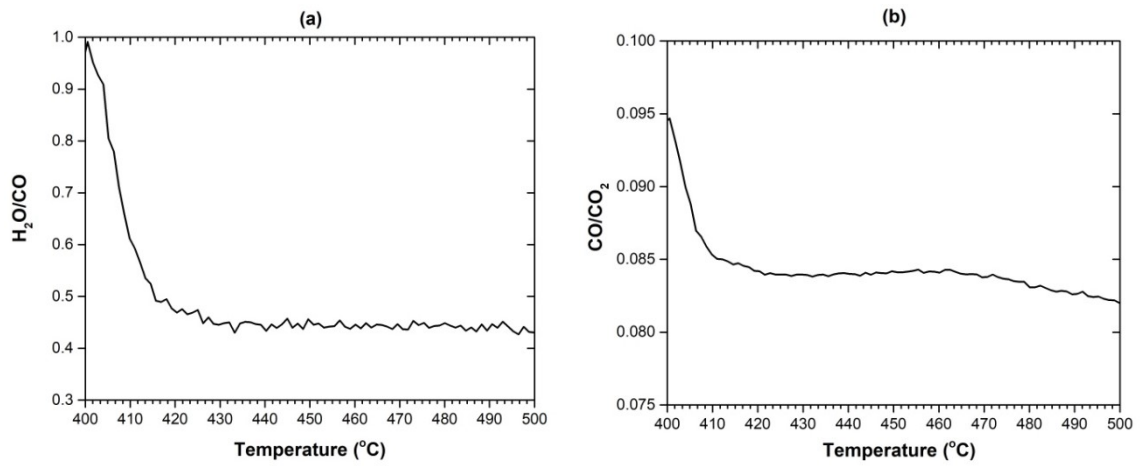

Figure 5 - (a)  $H_2O/CO$  and (b)  $CO/CO_2$  ratio from mass spectrometry measurements during RWGS reaction from 400 °C to 500 °C.

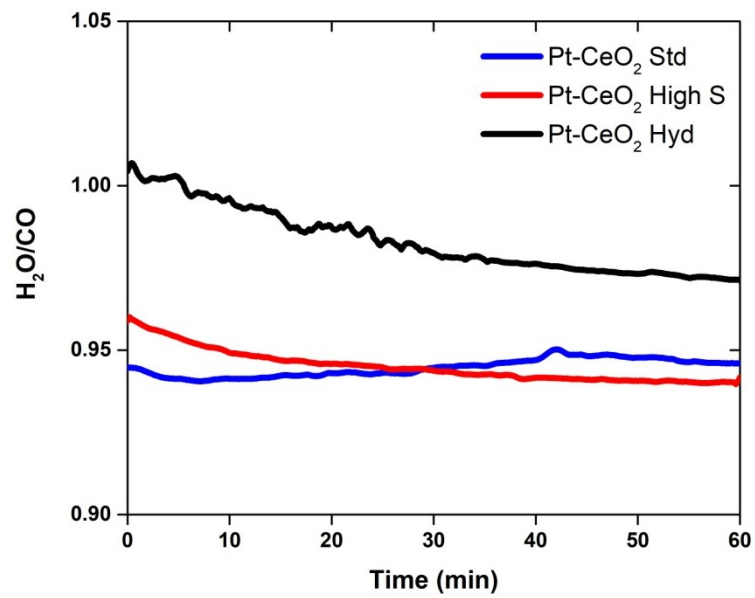

Figure 6 –  $H_2O/CO$  ratio from mass spectrometry measurements during RWGS reaction at 400 °C.

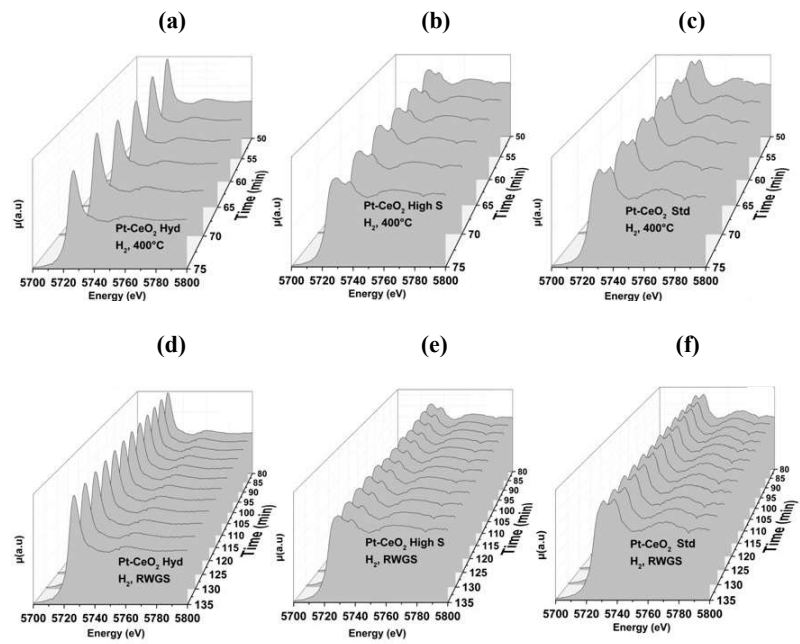

Figure 7 – In situ time-resolved XANES spectra at the Ce  $L_3$  edge of the Pt-CeO<sub>2</sub> samples during (a-c) reduction treatment at 400 °C under H<sub>2</sub> atmosphere and (d-f) RWGS reaction at 400 °C.

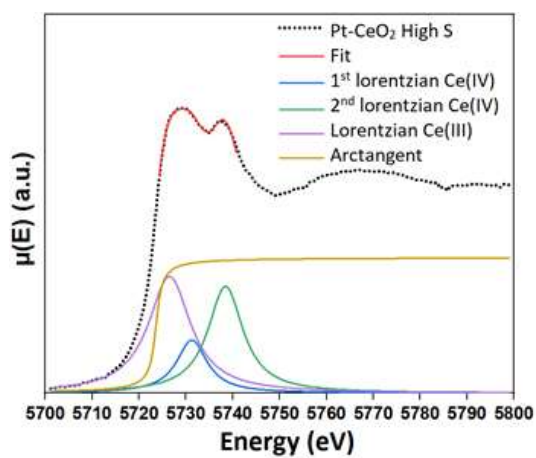

Figure 8 - Typical fit of the in situ XANES spectrum at the Ce  $L_3$  edge for the Pt-CeO<sub>2</sub> High S sample at the end of the heating process at 400 °C.

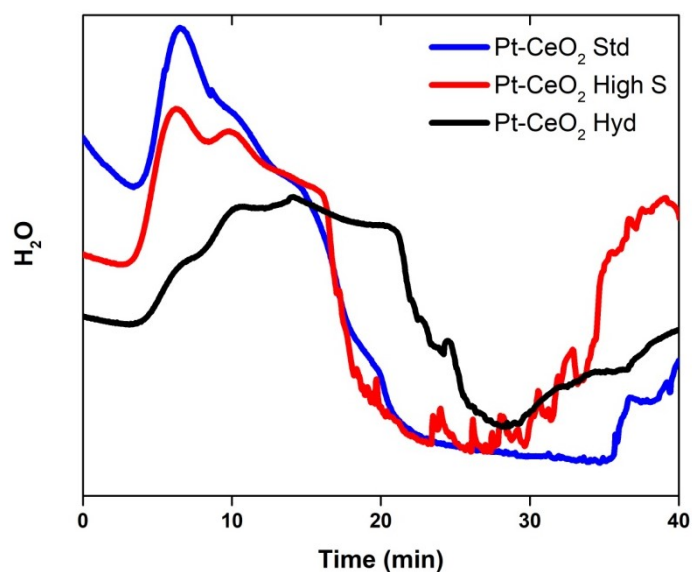

Figure 9 – H<sub>2</sub>-TPR measurement showing the detection of H<sub>2</sub>O as a function of temperature during heating to 400 °C.

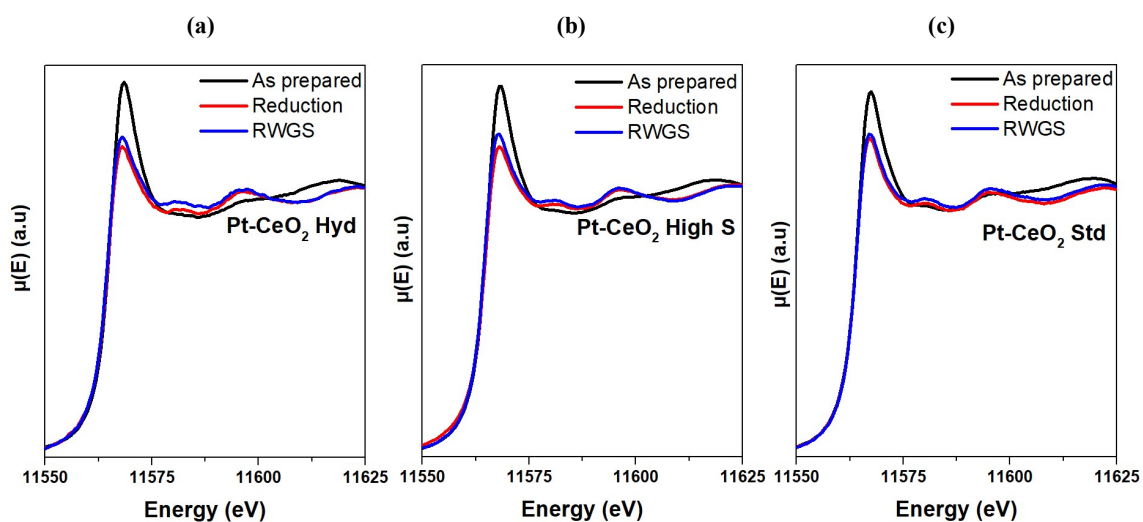

Figure 10 - In situ XAS spectra at the Pt L<sub>3</sub> edge of the (a) Pt-CeO<sub>2</sub> Hyd, (b) Pt-CeO<sub>2</sub> High S, and (c) Pt-CeO<sub>2</sub> Std. samples as prepared, during reduction treatment and RWGS reaction.

Table 1 – Parameters obtained from the fit result of the in situ EXAFS measurements at Pt L<sub>3</sub> edge. In the table, N, ΔR, σ<sup>2</sup>, c<sub>3</sub> and c<sub>4</sub> stand for the coordination number, variation of the interatomic distance between the absorbing and scattering atom, Debye-Waller factor, and third and fourth order EXAFS cumulant, respectively. The parameters associated to Pt-Pt, Pt-O and Pt-(OH)<sub>x</sub> scattering paths are associated to metallic Pt, PtO<sub>2</sub>, H<sub>2</sub>Pt(OH)<sub>6</sub> clusters, respectively.

| Sample                     | Parameters                                    | As Prepared    | Reduction         | RWGS reaction     |
|----------------------------|-----------------------------------------------|----------------|-------------------|-------------------|
| Pt-CeO <sub>2</sub> Hyd    | N <sub>Pt-Pt</sub>                            | 8.0 ± 1.0      | 9.7 ± 0.7         | 10.0 ± 0.8        |
|                            | N <sub>Pt-O</sub>                             | -              | 0.2 ± 0.2         | 0.8 ± 0.2         |
|                            | N <sub>Pt-(OH)<sub>x</sub></sub>              | 2.8 ± 0.3      | -                 | -                 |
|                            | ΔR <sub>Pt-Pt</sub>                           | 0.03 ± 0.01    | 0.014 ± 0.004     | 0.014 ± 0.004     |
|                            | ΔR <sub>Pt-O</sub>                            | -              | -0.11 ± 0.02      | -0.11 ± 0.03      |
|                            | ΔR <sub>Pt-(OH)<sub>x</sub></sub>             | -0.12 ± 0.01   | -                 | -                 |
|                            | σ <sup>2</sup> <sub>Pt-Pt</sub>               | 0.004 ± 0.003  | 0.0084 ± 0.0009   | 0.0084 ± 0.0009   |
|                            | σ <sup>2</sup> <sub>Pt-O</sub>                | -              | 0.014 ± 0.006     | 0.014 ± 0.006     |
|                            | σ <sup>2</sup> <sub>Pt-(OH)<sub>x</sub></sub> | 0.008 ± 0.002  | -                 | -                 |
|                            | c <sub>3</sub>                                | -              | 0.0008 ± 0.0002   | -0.0007 ± 0.0003  |
|                            | c <sub>4</sub>                                | -              | 0.0004 ± 0.0001   | 0.0004 ± 0.0001   |
| Pt-CeO <sub>2</sub> High S | N <sub>Pt-Pt</sub>                            | 7.2 ± 0.6      | 9.6 ± 0.4         | 9.8 ± 0.04        |
|                            | N <sub>Pt-O</sub>                             | -              | 0.62 ± 0.08       | 0.9 ± 0.1         |
|                            | N <sub>Pt-(OH)<sub>x</sub></sub>              | 2.1 ± 0.1      | -                 | -                 |
|                            | ΔR <sub>Pt-Pt</sub>                           | 0.010 ± 0.007  | 0.026 ± 0.003     | 0.026 ± 0.003     |
|                            | ΔR <sub>Pt-O</sub>                            | -              | -0.077 ± 0.009    | -0.077 ± 0.009    |
|                            | ΔR <sub>Pt-(OH)<sub>x</sub></sub>             | -0.114 ± 0.006 | -                 | -                 |
|                            | σ <sup>2</sup> <sub>Pt-Pt</sub>               | 0.005 ± 0.001  | 0.0109 ± 0.0005   | 0.0108 ± 0.0005   |
|                            | σ <sup>2</sup> <sub>Pt-O</sub>                | -              | 0.011 ± 0.002     | 0.011 ± 0.002     |
|                            | σ <sup>2</sup> <sub>Pt-(OH)<sub>x</sub></sub> | 0.004 ± 0.001  | -                 | -                 |
|                            | c <sub>3</sub>                                | -              | 0.00006 ± 0.00002 | -0.0001 ± 0.0002  |
|                            | c <sub>4</sub>                                | -              | 0.00048 ± 0.00007 | 0.00049 ± 0.00007 |
| Pt-CeO <sub>2</sub> Std    | N <sub>Pt-Pt</sub>                            | 8.6 ± 0.7      | 9.3 ± 0.7         | 9.8 ± 0.7         |
|                            | N <sub>Pt-O</sub>                             | -              | 0.5 ± 0.1         | 0.7 ± 0.1         |
|                            | N <sub>Pt-(OH)<sub>x</sub></sub>              | 2.0 ± 0.2      | -                 | -                 |
|                            | ΔR <sub>Pt-Pt</sub>                           | 0.017 ± 0.007  | 0.015 ± 0.004     | 0.015 ± 0.004     |
|                            | ΔR <sub>Pt-O</sub>                            | -              | -0.06 ± 0.02      | -0.06 ± 0.02      |
|                            | ΔR <sub>Pt-(OH)<sub>x</sub></sub>             | -0.109 ± 0.08  | -                 | -                 |
|                            | σ <sup>2</sup> <sub>Pt-Pt</sub>               | 0.005 ± 0.001  | 0.0103 ± 0.0008   | 0.0103 ± 0.0008   |
|                            | σ <sup>2</sup> <sub>Pt-O</sub>                | -              | 0.007 ± 0.003     | 0.007 ± 0.003     |
|                            | σ <sup>2</sup> <sub>Pt-(OH)<sub>x</sub></sub> | 0.006 ± 0.002  | -                 | -                 |
|                            | c <sub>3</sub>                                | -              | -0.0005 ± 0.0003  | -0.0005 ± 0.0003  |
|                            | c <sub>4</sub>                                | -              | 0.0005 ± 0.0001   | 0.0006 ± 0.0001   |
